# Supplementary material
Source: Research Square preprint supplement (doi:10.21203/rs.3.rs-9600032/v1)
Supplement: Supplementary file 1 [file 079c12b2aadb22969eda7547.docx]

**Supplementary Table 1. Prevalence of sarcopenia across BMI categories by sex and diagnostic criteria**

| **Sex** | **BMI (kg/m2)** | **n** | **AWGS 2025 SMI (%)** | **AWGS 2019 SMI (%)** | **AWGS 2025 ASM/BMI (%)** |
| --- | --- | --- | --- | --- | --- |
| **Male** | <20 | 25 | 60.0 | 48.0 | 36.0 |
|  | 20–25 | 138 | 23.9 | 15.2 | 20.3 |
|  | 25–30 | 90 | 7.8 | 5.6 | 20.0 |
|  | 30–35 | 24 | 4.2 | 4.2 | 12.5 |
|  | ≥35 | 5 | 0.0 | 0.0 | 0.0 |
| **Female** | <20 | 38 | 57.9 | 55.3 | 18.4 |
|  | 20–25 | 88 | 29.5 | 28.4 | 38.6 |
|  | 25–30 | 74 | 4.1 | 4.1 | 29.7 |
|  | 30–35 | 18 | 0.0 | 0.0 | 38.9 |
|  | ≥35 | 5 | 0.0 | 0.0 | 40.0 |

Sarcopenia was defined according to the Asian Working Group for Sarcopenia (AWGS) 2019 and 2025 criteria using the height-adjusted skeletal muscle index (SMI) and body mass index (BMI)-adjusted skeletal muscle index (ASM/BMI). Values are expressed as percentages.

**Supplementary Table 2. Incremental prognostic value of sarcopenia definitions for overall survival**

| **Group** | **Time** | **Model** | **AUC (95% CI)** | **ΔAUC (95% CI)** | **P value** |
| --- | --- | --- | --- | --- | --- |
| **Overall** | 3 years | Baseline | 0.792 (0.738–0.847) | Reference | — |
|  |  | AWGS 2025 SMI | 0.828 (0.780–0.876) | 0.036 (0.004–0.067) | 0.028 |
|  |  | AWGS 2019 SMI | 0.822 (0.771–0.874) | 0.030 (0.000–0.059) | 0.049 |
|  |  | AWGS 2025 ASM/BMI | 0.800 (0.747–0.853) | 0.007 (−0.014–0.028) | 0.490 |
|  | 5 years | Baseline | 0.808 (0.757–0.860) | Reference | — |
|  |  | AWGS 2025 SMI | 0.828 (0.779–0.876) | 0.020 (−0.009–0.048) | 0.186 |
|  |  | AWGS 2019 SMI | 0.822 (0.773–0.871) | 0.014 (−0.014–0.041) | 0.328 |
|  |  | AWGS 2025 ASM/BMI | 0.809 (0.758–0.859) | 0.001 (−0.018–0.019) | 0.971 |
| **Male** | 3 years | Baseline | 0.726 (0.644–0.808) | Reference | — |
|  |  | AWGS 2025 SMI | 0.779 (0.707–0.852) | 0.053 (0.003–0.103) | 0.039 |
|  |  | AWGS 2019 SMI | 0.761 (0.680–0.843) | 0.035 (−0.009–0.079) | 0.116 |
|  |  | AWGS 2025 ASM/BMI | 0.783 (0.712–0.855) | 0.057 (0.006–0.108) | 0.028 |
|  | 5 years | Baseline | 0.748 (0.672–0.823) | Reference | — |
|  |  | AWGS 2025 SMI | 0.795 (0.725–0.865) | 0.047 (0.003–0.091) | 0.036 |
|  |  | AWGS 2019 SMI | 0.785 (0.714–0.857) | 0.038 (−0.000–0.076) | 0.052 |
|  |  | AWGS 2025 ASM/BMI | 0.779 (0.706–0.852) | 0.031 (−0.010–0.072) | 0.136 |
| **Female** | 3 years | Baseline | 0.870 (0.806–0.934) | Reference | — |
|  |  | AWGS 2025 SMI | 0.899 (0.851–0.948) | 0.029 (−0.013–0.072) | 0.179 |
|  |  | AWGS 2019 SMI | 0.899 (0.850–0.948) | 0.029 (−0.014–0.071) | 0.191 |
|  |  | AWGS 2025 ASM/BMI | 0.873 (0.809–0.936) | 0.002 (−0.001–0.006) | 0.141 |
|  | 5 years | Baseline | 0.888 (0.829–0.947) | Reference | — |
|  |  | AWGS 2025 SMI | 0.893 (0.837–0.949) | 0.005 (−0.038–0.048) | 0.820 |
|  |  | AWGS 2019 SMI | 0.892 (0.835–0.948) | 0.004 (−0.040–0.048) | 0.869 |
|  |  | AWGS 2025 ASM/BMI | 0.890 (0.830–0.949) | 0.002 (−0.001–0.005) | 0.266 |

ΔAUC represents the difference in AUC between the baseline and extended models, including each sarcopenia definition. Confidence intervals and P-values were estimated using paired bootstrap resampling.

ASM, appendicular skeletal muscle mass; AWGS, Asian Working Group for Sarcopenia, BMI, body mass index; SMI, skeletal mass index; ASM/BMI

**Supplementary Table 3. Calibration-in-the-large (CITL) and calibration slope across models and time points.**

| **Group** | **Time** | **Model** | **n** | **Events** | **CITL** | **Slope** |
| --- | --- | --- | --- | --- | --- | --- |
| **Overall** | 1 year | AWGS 2025 SMI | 505 | 29 | 0.021 | 1.002 |
|  |  | AWGS 2019 SMI | 505 | 29 | 0.018 | 1.003 |
|  |  | AWGS 2025 ASM/BMI | 505 | 29 | 0.027 | 0.998 |
|  | 3 years | AWGS 2025 SMI | 505 | 80 | 0.042 | 0.996 |
|  |  | AWGS 2019 SMI | 505 | 80 | 0.045 | 0.998 |
|  |  | AWGS 2025 ASM/BMI | 505 | 80 | 0.039 | 0.994 |
|  | 5 years | AWGS 2025 SMI | 505 | 110 | 0.003 | 1.003 |
|  |  | AWGS 2019 SMI | 505 | 110 | 0.001 | 1.004 |
|  |  | AWGS 2025 ASM/BMI | 505 | 110 | −0.006 | 1.000 |
| **Male** | 1 year | AWGS 2025 SMI | 282 | 20 | 0.182 | 0.988 |
|  |  | AWGS 2019 SMI | 282 | 20 | 0.177 | 0.992 |
|  |  | AWGS 2025 ASM/BMI | 282 | 20 | −0.129 | 0.941 |
|  | 3 years | AWGS 2025 SMI | 282 | 48 | 0.033 | 0.991 |
|  |  | AWGS 2019 SMI | 282 | 48 | 0.038 | 0.995 |
|  |  | AWGS 2025 ASM/BMI | 282 | 48 | −0.142 | 0.947 |
|  | 5 years | AWGS 2025 SMI | 282 | 66 | 0.030 | 0.988 |
|  |  | AWGS 2019 SMI | 282 | 66 | 0.026 | 0.994 |
|  |  | AWGS 2025 ASM/BMI | 282 | 66 | −0.027 | 0.922 |
| **Female** | 1 year | AWGS 2025 SMI | 223 | 9 | −0.318 | 1.020 |
|  |  | AWGS 2019 SMI | 223 | 9 | −0.319 | 1.019 |
|  |  | AWGS 2025 ASM/BMI | 223 | 9 | −0.224 | 1.037 |
|  | 3 years | AWGS 2025 SMI | 223 | 32 | 0.055 | 1.004 |
|  |  | AWGS 2019 SMI | 223 | 32 | 0.057 | 1.003 |
|  |  | AWGS 2025 ASM/BMI | 223 | 32 | 0.046 | 1.030 |
|  | 5 years | AWGS 2025 SMI | 223 | 44 | −0.044 | 1.029 |
|  |  | AWGS 2019 SMI | 223 | 44 | −0.045 | 1.029 |
|  |  | AWGS 2025 ASM/BMI | 223 | 44 | −0.039 | 1.050 |

CITL (calibration-in-the-large) reflects the agreement between the predicted and observed risks, with values close to 0 indicating good calibration. The calibration slope reflects the agreement in risk dispersion, with values close to 1 indicating optimal calibration.

ASM, appendicular skeletal muscle mass; AWGS, Asian Working Group for Sarcopenia, BMI, body mass index; SMI, skeletal mass index; ASM/BMI
