# Supplementary material
Source: Research Square preprint supplement (doi:10.21203/rs.3.rs-9600032/v1)

Graphical abstract


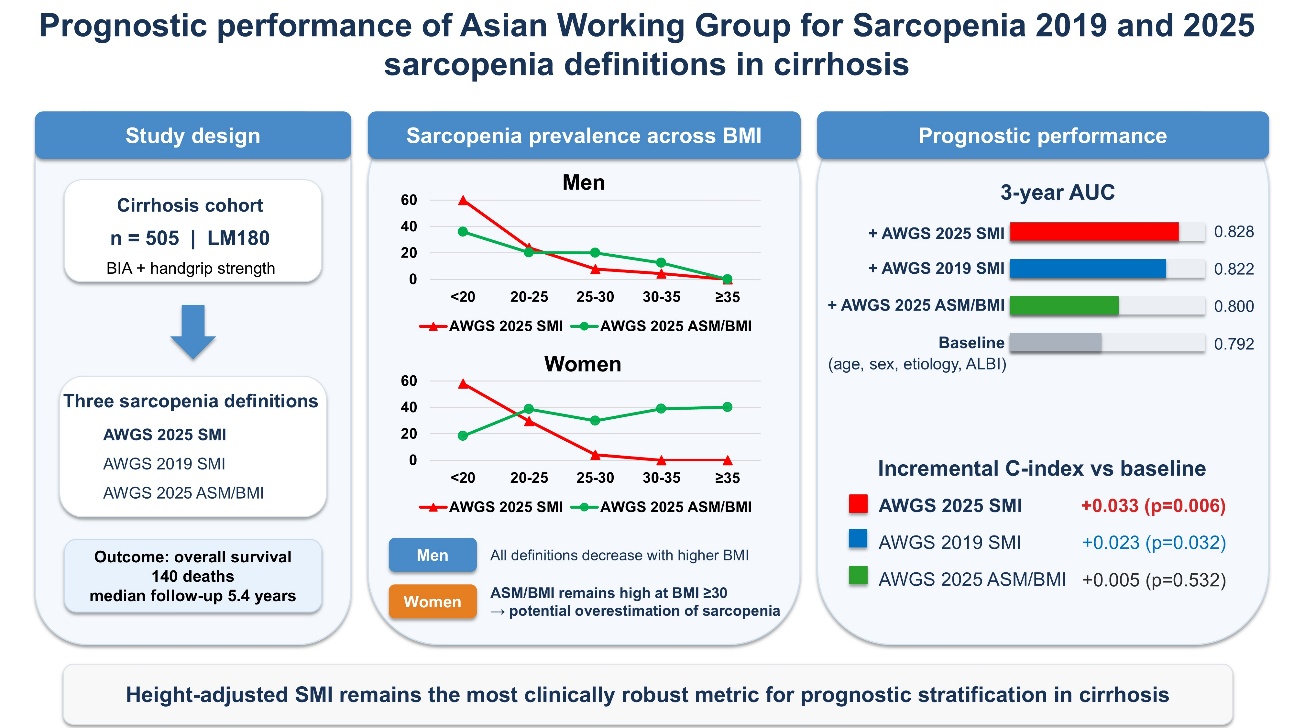

Supplement: Supplementary file 2 [file 08924c7463a1aa9966cfa05e.docx]
